# Supplementary material for: Superinfection between Influenza and RSV Alternating Patterns in San Luis Potosí State, México
Source: PLOS journal article supplement (doi:10.1371/journal.pone.0115674), 2015-03-24
Supplement: S2 (10.1371/journal.pone.0115674.s002) [file journal.pone.0115674.s002]

# Superinfection between influenza and RSV alternating patterns in San Luis Potosí State, México. SUPPLEMENTARY MATERIAL

J.X. Velasco-Hernández      M. Núñez-López  
A. Comas-García      D. E. Noyola      M. Capistrán

February 18, 2015

The SEIRS model for diseases has a long history and has been amply analyzed. Here we will limit ourselves to the determination of equilibrium points and a local stability analysis and numerical simulations of relevant characteristics. In this section we consider only the case where the contact rates  $\beta_j$  are constant. To ease the mathematical analysis we consider the case where  $\theta_1 = \theta_2$  and then illustrate the consequences of the inequality numerically.

The phase space of our model is the subset of the non-negative cone

$$\Omega = \{(S, E_1, I_1, R_1, E_2, I_2, R_2) \in R^7 : 0 \leq S + E_1 + I_1 + R_1 + E_2 + I_2 + R_2 \leq 1\}.$$

Applying the next-generation matrix methodology (Velasco-Hernández, 1994) we obtain that the reproduction number for the system is

$$R_0 = \max\{R_{01}, R_{02}\},$$

where

$$R_{0j} = \frac{\beta_j \gamma_j}{(\mu + \eta_j)(\mu + \gamma_j)} \quad j = 1, 2.$$

The disease-free equilibrium exists and it is given as  $P_0 = (1, 0, 0, 0, 0, 0, 0)$ .

The boundary equilibria (those equilibrium points where only one of the diseases exist) can be computed from the equations. Here we only write the

expressions for the infectious states  $I_1^*$  and  $I_2^*$  since they play a role in the discussion that follows:

$$I_1^* = \frac{(\mu + \theta)^2(\mu + \eta_1)(R_{01} - 1)}{\beta_1(\mu(\theta + \mu)(\mu + \eta_1) + \gamma_1(\theta + \mu + \eta_1))},$$

$$I_2^* = \frac{\mu(\mu + \theta)^2(\mu + \eta_2)(R_{02} - 1)}{\beta_2((\mu + \gamma_2)(\theta + \mu)(\mu + \eta_2) - \gamma_2\theta\eta_1)}.$$

Note that the denominator of  $I_2^*$  depends on  $\eta_1$ . We will denote the equilibrium point where only virus  $j$  is present as  $P_j$ .

To determine the existence of an interior equilibrium point (where both viruses are present in the system) we equate the right-hand side of our equations to zero and, after some algebraic manipulations, we can obtain expressions for the coordinates of the equilibrium points. The existence, uniqueness and positivity of any of the possible interior equilibria present difficulties due to the number of parameters that the model has. However, we can explore an special case and from it we will attempt a generalization.

Set  $\sigma = 1$ . This is interpreted as assuming that the secondary infection takes place with contact rates identical to those recorded for infections of naive hosts. After some algebraic manipulation we can see that  $I_1^{**}$  depends on the reproduction numbers of both viruses whereas  $I_2^{**}$  depends only of a single parameter of the other virus:  $\eta_1$ . In other words, changes in the parameters related to virus 1 have little, if any, effect on the density of  $I_2$  at equilibrium whereas changes in the parameters for virus 2 can have a large effect on the equilibrium value and even on the biological feasibility of  $I_1$ .

To find the interior equilibrium point we reduce the original seven equations to a system of two bivariate functions

$$m_1(I_1, I_2) = 0, \quad m_2(I_1, I_2) = 0$$

whose solutions give the coordinates  $(I_1^{**}, I_2^{**})$  of the interior equilibrium point. Following backwards the process of simplification done to obtain the rational functions  $m_1$  and  $m_2$  we can recover the rest of the coordinates. If  $I_1^{**}$  and  $I_2^{**}$  are positive, so are the rest of the coordinates. For the special case  $\sigma = 1$  one can solve the system explicitly to obtain that

$$I_1^{**} = I_1^{**}(R_{01}, R_{02}), \quad I_2^{**} = I_2^{**}(\eta_1).$$

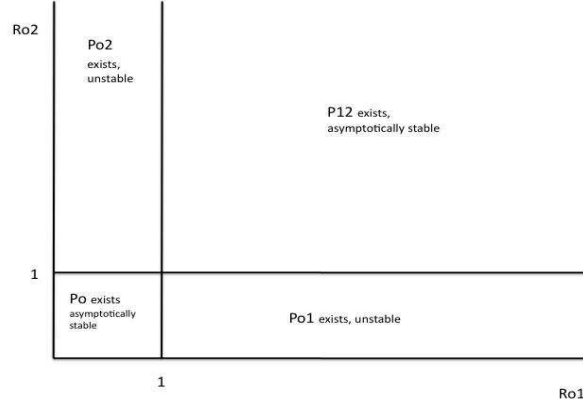

Figure A: **Existence of equilibrium points as a function of the reproduction numbers.**  $P_j$  denotes boundary equilibria where only one virus population exists;  $P_{12}$  denotes an interior equilibrium with both viral populations existing. The stability properties of each point were computed numerically using the values in Table 1 with influenza as virus 1 and RSV as virus 2.

Using the expression for the boundary equilibrium for  $I_2^*$ , we can see that its existence depends on two conditions: the first, the typical one, is that  $R_{02} > 1$ , the second however is interesting, see Figure A.

Now we will explore numerically the consequences of assuming the more realistic scenario of having two different durations of immunity. Using the baseline value of  $\theta = 0.0001$  (see main text) we verified the effect that a different value of  $\theta_1$  has on the overall dynamics of the epidemics. In Figure B a lower value of  $\theta_1$  conserves the frequency of the oscillations (but not the amplitude which is lower than before). Taking higher values of  $\theta_1$  essentially preserved the frequency and makes the amplitude more regular. In Figure C we show the dynamics with a much smaller base line immunity value for the superior competitor. Here the dynamics is very much different to the observed in the previous case and in the data. Thus, the qualitative dynamical behavior of the model does not change under the first scenario described above which is the one of interest in this work.

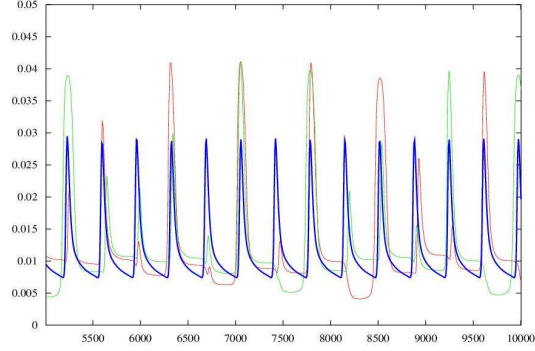

Figure B: **Simulations for  $\hat{R} = R_1/R_2$  for total cases (RSV plus influenza) and  $\theta_2$  fixed.** The red line is when  $\theta_1 = \theta_2$ , green line stands  $\theta_2 > \theta_1$  and blue line  $\theta_1 > \theta_2$ . For all cases  $\theta_2 = 0.0001$ .

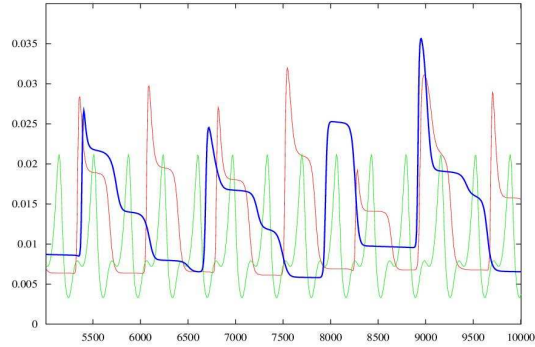

Figure C: **Simulations for  $\hat{R} = R_1/R_2$  for total cases (RSV plus influenza) and  $\theta_1$  fixed.** The red line is when  $\theta_1 = \theta_2$ , green line stands  $\theta_2 > \theta_1$  and blue line stands  $\theta_1 > \theta_2$ . For all cases  $\theta_1 = 0.00005$ .

Finally, to obtain the forcing function  $f(t)$  that multiplies the contact rate  $\beta_k$  we obtained the data for daily temperatures and adjusted a trigonometric polynomial to it resulting in the function

$$\begin{aligned} f(t) = & 17.33 + 0.480 \sin \left[ \frac{2\pi}{365} t \right] - 0.40 \sin \left[ \frac{2\pi}{365} 2t \right] - 4.03 \cos \left[ \frac{2\pi}{365} t \right] \\ & - 1.05 \cos \left[ \frac{2\pi}{365} 2t \right] \end{aligned}$$

In supplement 1 we are estimating the reproduction number for each outbreak assuming that the time scales of infection and recovery are significantly shorter than the time scale of the environmental fluctuation. This assumption allows us to zoom in on each outbreak and treat it as an isolated event where the demographic and epidemiological processes dominate over the environmentally driven oscillations.
